# Supplementary material for: A reversed strategy for designing high-performance anode materials from a traditional NaxV2O5 cathode
Source: Royal Society of Chemistry journal article supplement (doi:10.1039/d4ta05683c), 2024-01-01
Supplement: d4ta05683c1.pdf [file d4ta05683c1.pdf]

## Supporting information

### A reversed strategy for designing high-performance anode material from traditional $\text{Na}_x\text{V}_2\text{O}_5$ cathode

Jing Yao, Meichun He, Pengju Li\*, Chao Zhu, Dongmei Zhang, Cunyuan Pei, Bing Sun, Shibing Ni\*

College of Materials and Chemical Engineering, China Three Gorges University, Yichang, 443002,  
PR China

\* Corresponding author (email: lipengju11@126.com (P. Li); shibingni07@126.com (S. Ni))

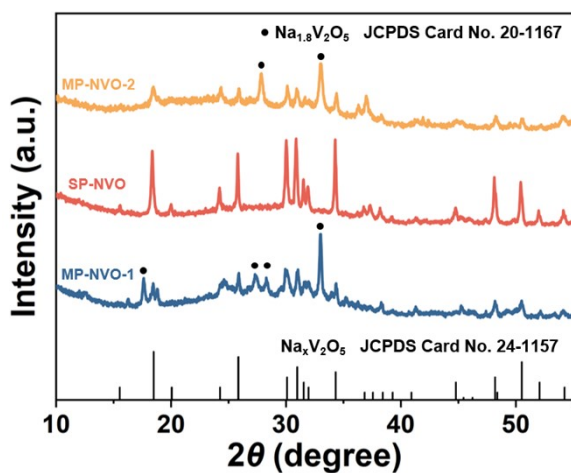

Fig. S1 XRD patterns of MP-NVO-1, SP-NVO and MP-NVO-2.

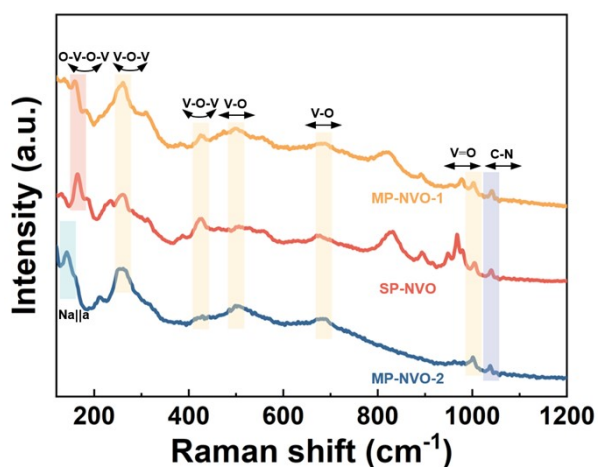

Fig. S2 Raman spectra of MP-NVO-1, SP-NVO and MP-NVO-2.

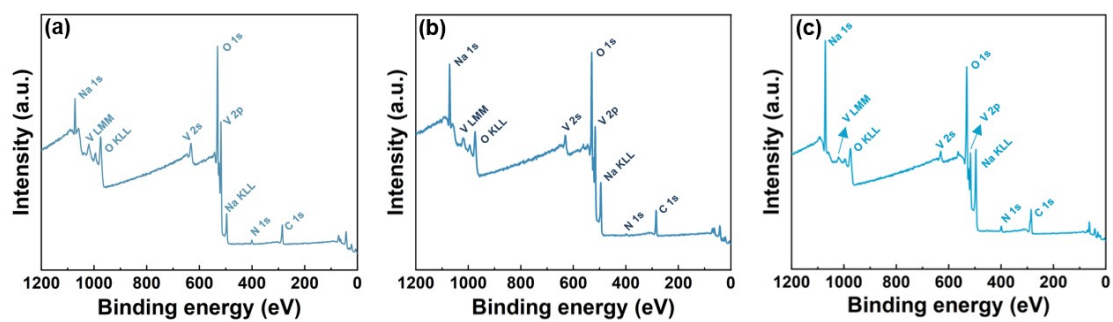

**Fig. S3** XPS surveys of (a) MP-NVO-1, (b) SP-NVO and (c) MP-NVO-2.

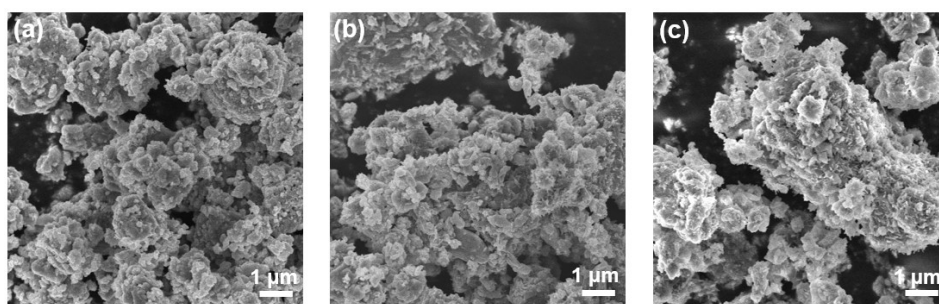

**Fig. S4** SEM images of (a) MP-NVO-1, (b) SP-NVO and (c) MP-NVO-2.

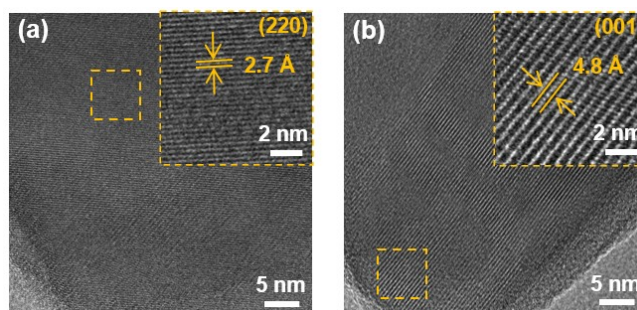

**Fig. S5** HRTEM images of (a)  $\kappa$ - $\text{Na}_x\text{V}_2\text{O}_5$  and (b)  $\alpha'$ - $\text{Na}_x\text{V}_2\text{O}_5$  phase in MP-NVO-1.

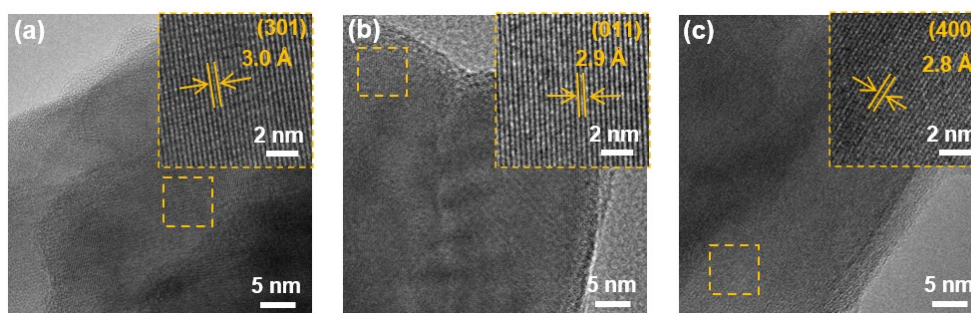

**Fig. S6** HRTEM images of SP-NVO.

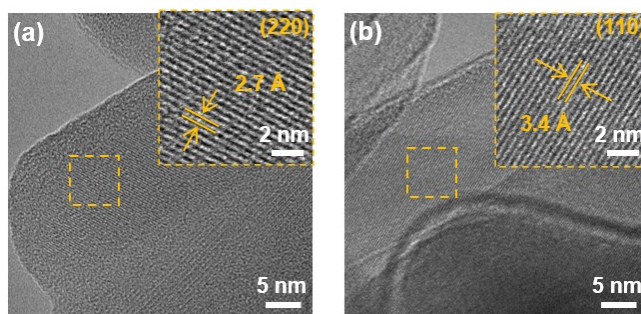

**Fig. S7** HRTEM images of (a)  $\kappa$ - $\text{Na}_x\text{V}_2\text{O}_5$  and (b)  $\alpha'$ - $\text{Na}_x\text{V}_2\text{O}_5$  phase in MP-NVO-2.

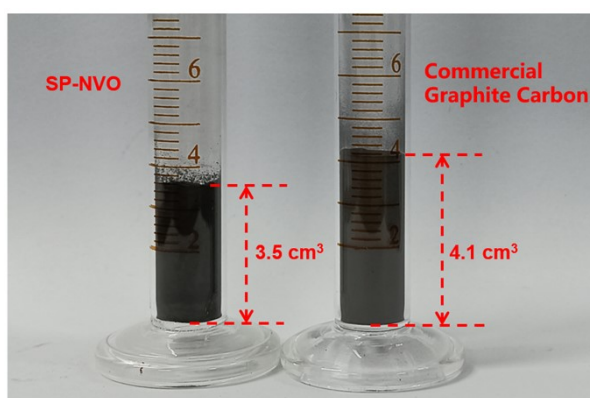

**Fig. S8** Comparison of volume between SP-NVO and commercial graphite with same mass.

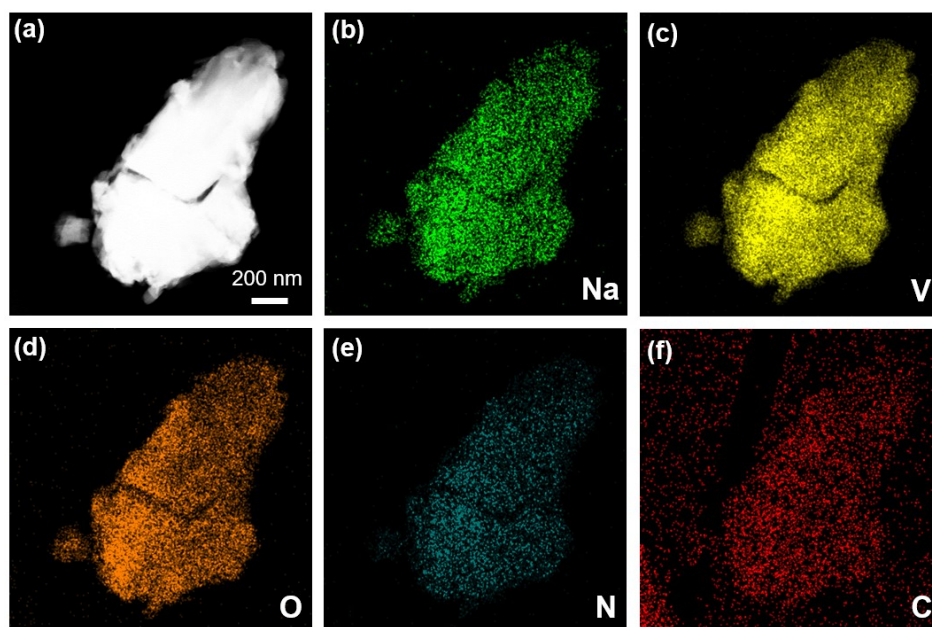

**Fig. S9** Elemental mapping images of SP-NVO.

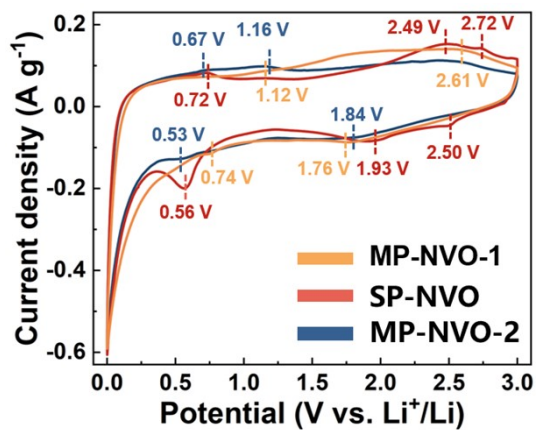

Fig. S10 CV curves of MP-NVO-1, SP-NVO and MP-NVO-2 electrodes at 0.2 mV s<sup>-1</sup>.

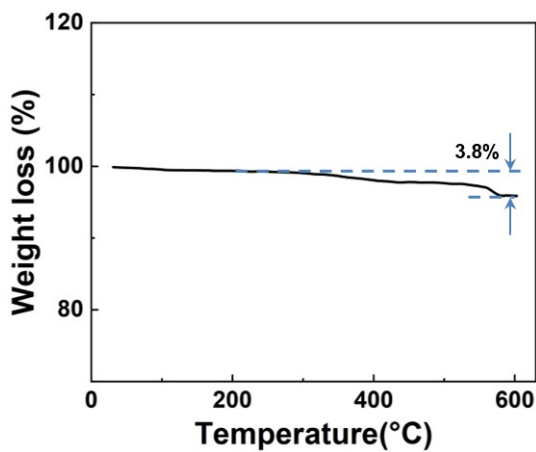

Fig. S11 TG curve of SP-NVO sample.

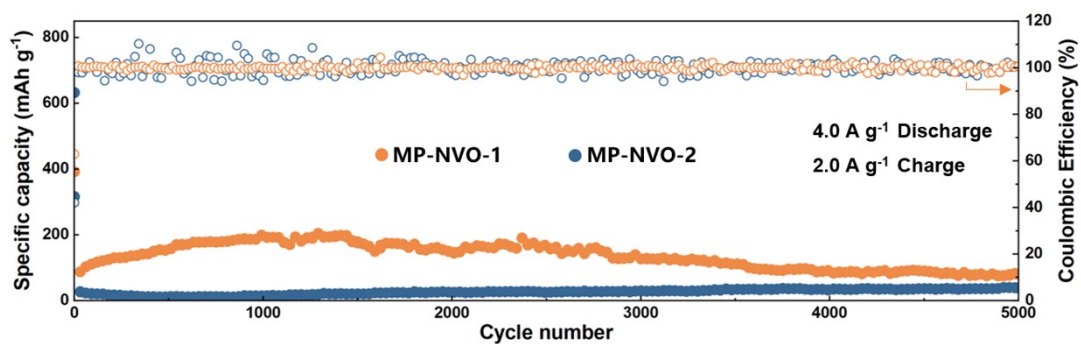

Fig. S12 Cycling performance of MP-NVO-1 and MP-NVO-2 electrodes at a charging/discharging current of 2.0/4.0 A g<sup>-1</sup>.



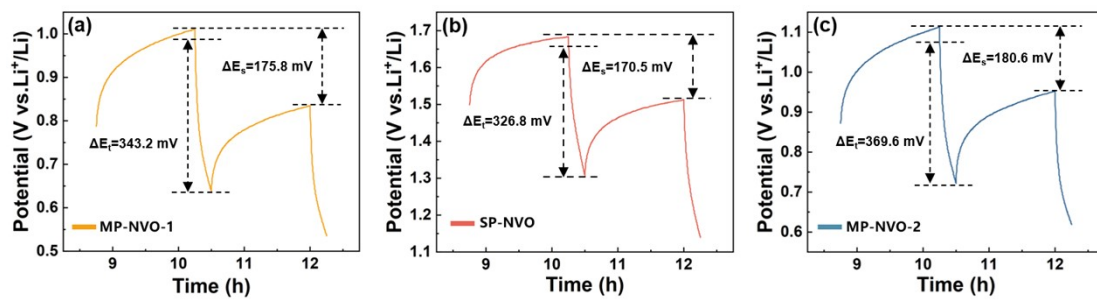

**Fig. S13** Single GITT procedure for (a) MP-NVO-1, (b) SP-NVO and (c) MP-NVO-2 electrodes during the discharge process.

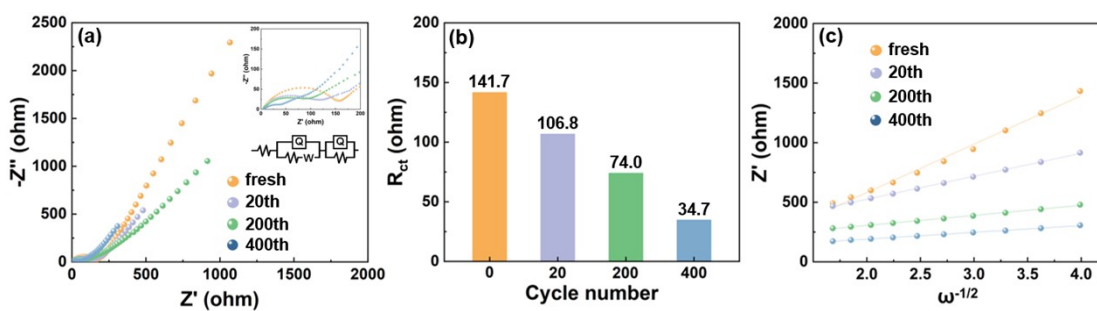

**Fig. S14** (a) Nyquist plots, (b) fitted  $R_{ct}$  and (c)  $Z'$  vs.  $\omega^{-1/2}$  curves ( $D_{Li^+}$  determination) of SP-NVO electrode after different cycles.

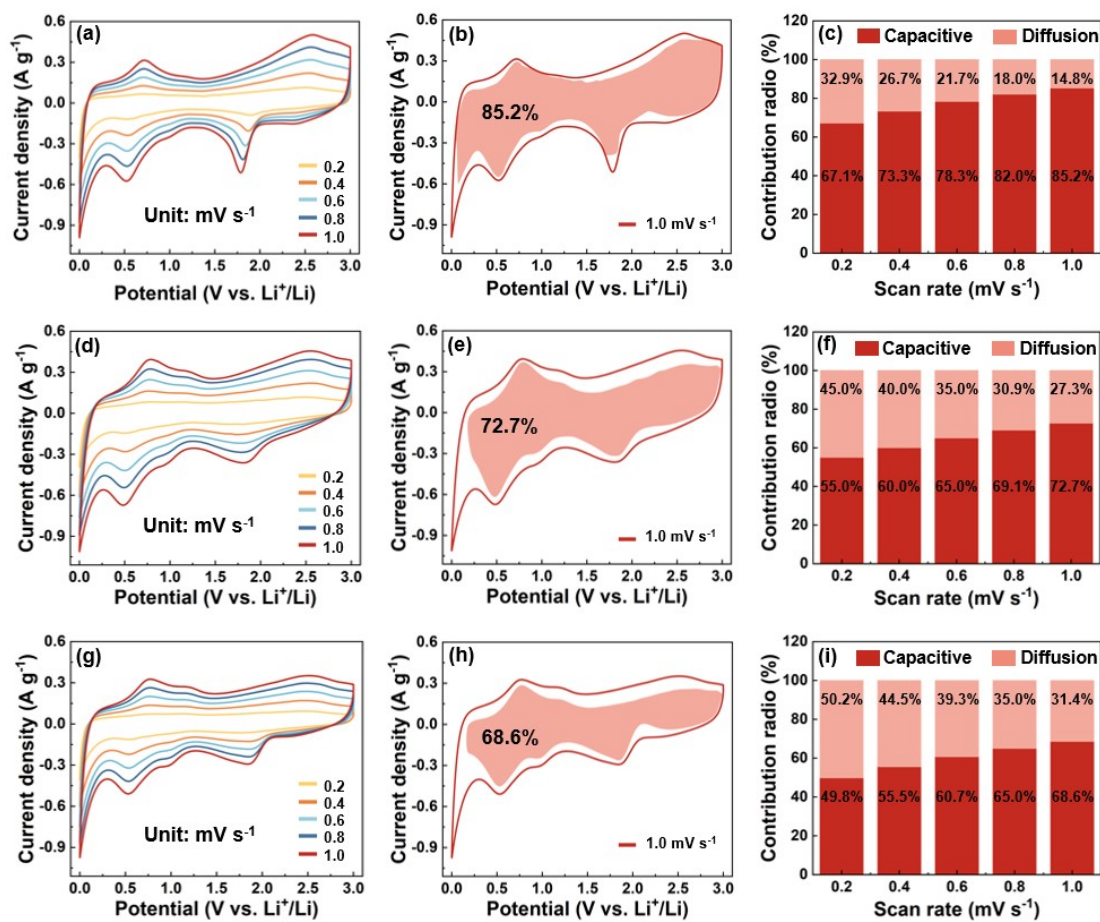

**Fig. S15** (a, d, g) CV curves at various scan rates from 0.2 to 1.0  $mV\ s^{-1}$ , (b, e, h) capacitive energy storage contribution at 1.0  $mV\ s^{-1}$ , and (c, f, i) capacitive energy storage contribution ratios of (a, b, c) SP-NVO, (d, e, f) MP-NVO-1 and (g, h, i) MP-NVO-2 electrodes.

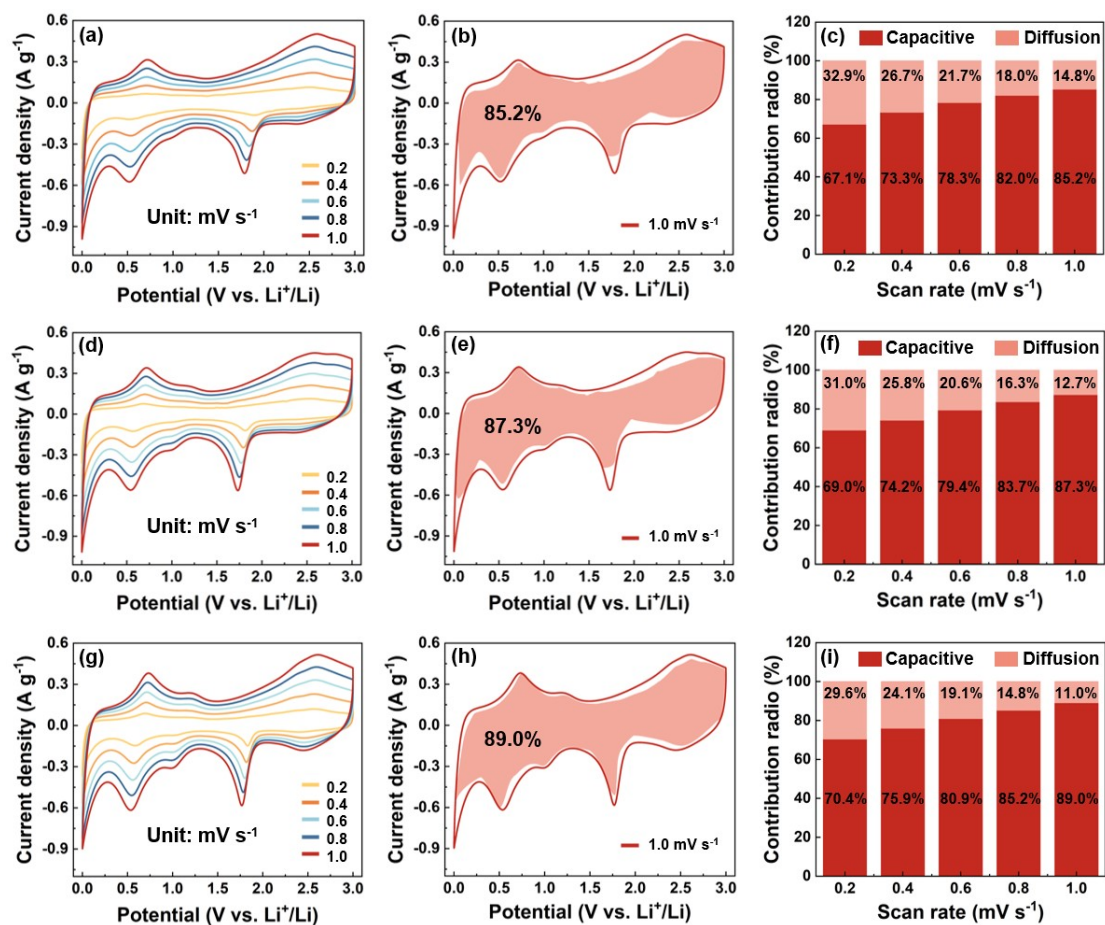

**Fig. S16** (a, d, g) CV curves at various scan rates from 0.2 to 1.0 mV s<sup>-1</sup>, (b, e, h) capacitive energy storage contribution at 1.0 mV s<sup>-1</sup>, and (c, f, i) capacitive energy storage contribution ratios of SP-NVO (a, b, c) fresh electrode, (d, e, f) cycled electrode after 10 cycles, and (g, h, i) cycled electrode after 20 cycles.

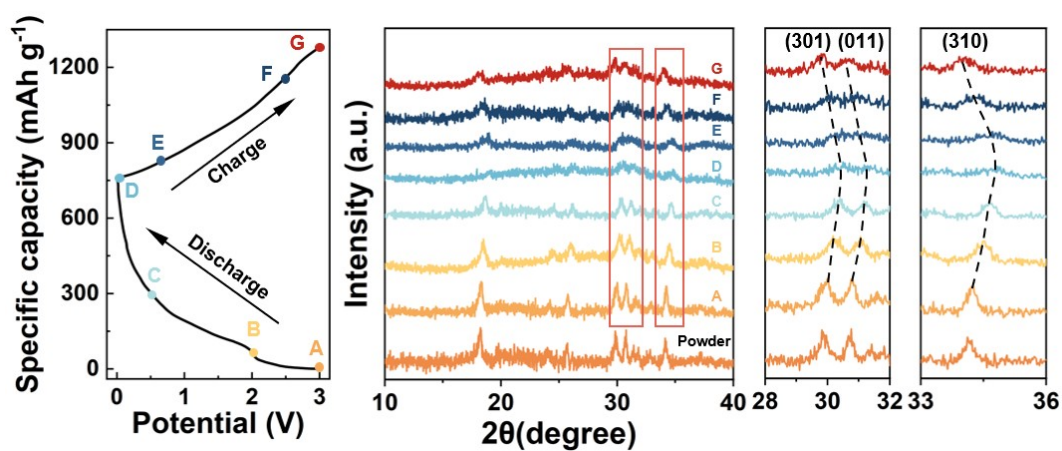

**Fig. S17** Ex-situ XRD patterns at different discharge/charge states of SP-NVO electrodes.

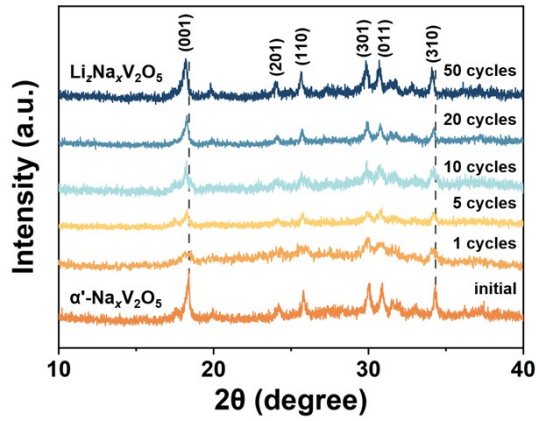

Fig. S18 XRD patterns of cycled SP-NVO electrode after different cycles.

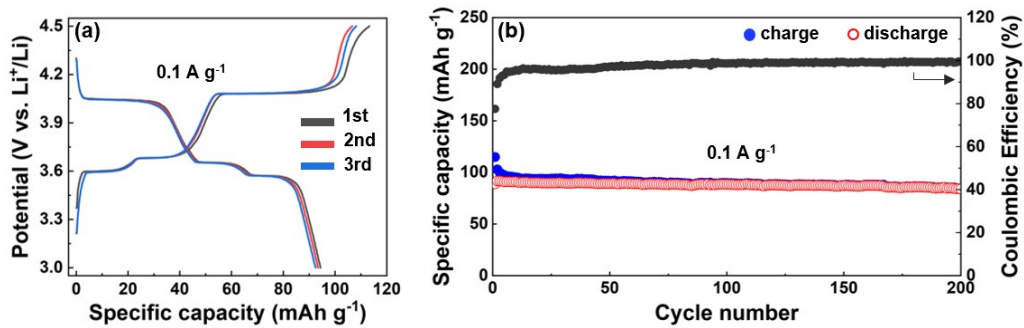

Fig. S19 (a) Galvanostatic charge-discharge profiles and (b) cycling performance of  $\text{Li}_3\text{V}_2(\text{PO}_4)_3$  at  $0.1 \text{ A g}^{-1}$ .

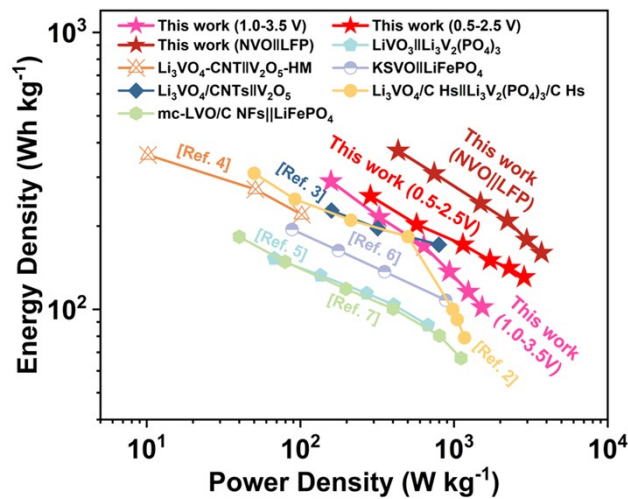

Fig. S20 Ragone plots of SP-NVO|| $\text{Li}_3\text{V}_2(\text{PO}_4)_3$  compared to the previously reported vanadium-based full cells.



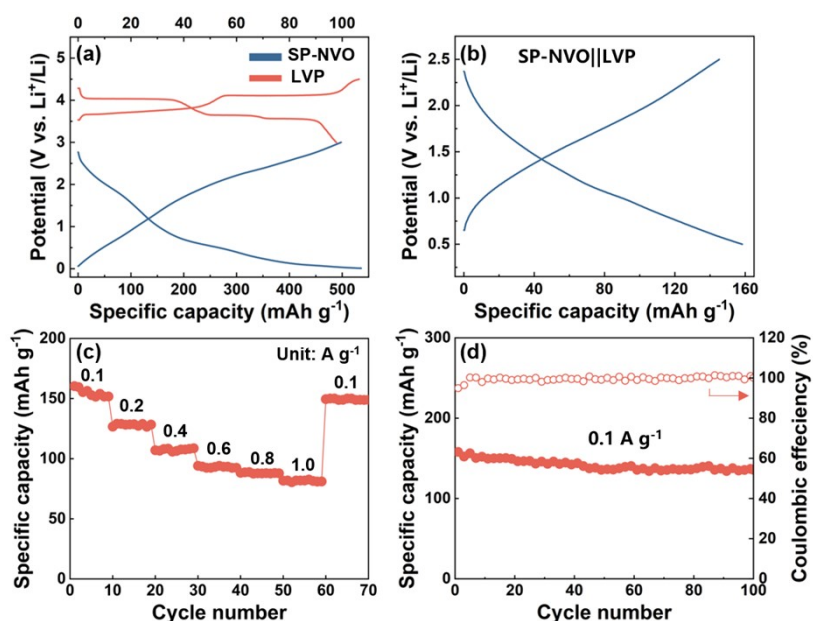

**Fig. S21** Electrochemical performance of SP-NVO|| $\text{Li}_3\text{V}_2(\text{PO}_4)_3$  Li-ion full cell at 0.5~2.5V. (a) charge-discharge profiles of SP-NVO and  $\text{Li}_3\text{V}_2(\text{PO}_4)_3$ ; (b) the corresponding charge-discharge profiles of SP-NVO|| $\text{Li}_3\text{V}_2(\text{PO}_4)_3$  full cell; (c) rate performance and (d) cycling performance of SP-NVO|| $\text{Li}_3\text{V}_2(\text{PO}_4)_3$  full cell.

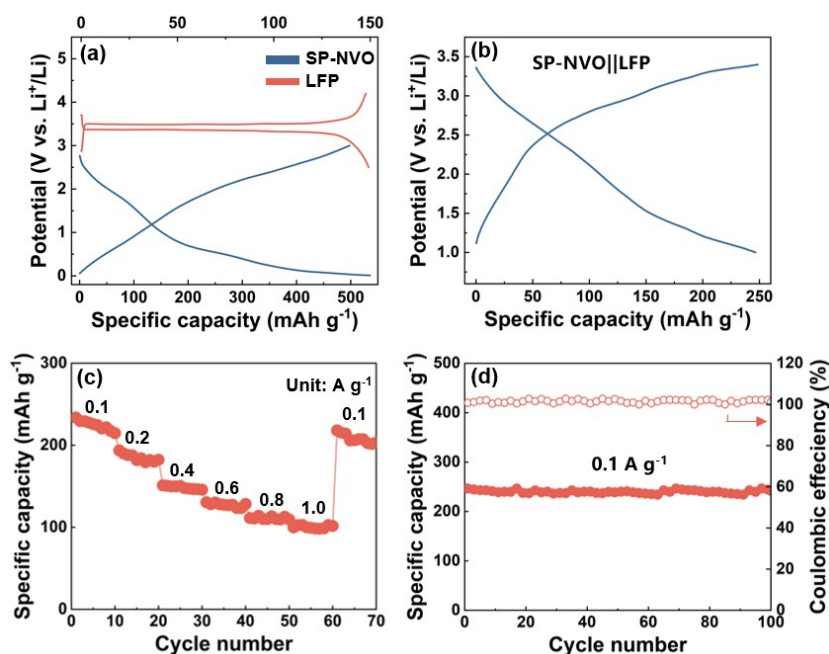

**Fig. S22** Electrochemical performance of SP-NVO|| $\text{LiFePO}_4$  Li-ion full cell at 1.0~3.5V. (a) charge-discharge profiles of SP-NVO and  $\text{LiFePO}_4$ ; (b) the corresponding charge-discharge profiles of SP-NVO|| $\text{LiFePO}_4$  full cell; (c) rate performance and (d) cycling performance of SP-NVO|| $\text{LiFePO}_4$  full cell.

**Table S1 The V<sup>4+</sup>/V<sup>5+</sup> molar ratios of Na<sub>x</sub>V<sub>2</sub>O<sub>5</sub> samples.**

| Samples  | The peak area of V <sup>4+</sup> | The peak area of V <sup>5+</sup> | The molar ratio V <sup>4+</sup> /V <sup>5+</sup> (%) | The reduced content of V <sup>5+</sup> to V <sup>4+</sup> (%) | The formula                                      |
|----------|----------------------------------|----------------------------------|------------------------------------------------------|---------------------------------------------------------------|--------------------------------------------------|
| MP-NVO-1 | 33487.3 eV                       | 140198.2 eV                      | 24.0                                                 | 19.0                                                          | Na <sub>0.38</sub> V <sub>2</sub> O <sub>5</sub> |
| SP-NVO   | 33959.3 eV                       | 68418.4 eV                       | 49.6                                                 | 33.3                                                          | Na <sub>0.67</sub> V <sub>2</sub> O <sub>5</sub> |
| MP-NVO-2 | 55874.3 eV                       | 56335.4 eV                       | 99.2                                                 | 49.8                                                          | Na <sub>1.00</sub> V <sub>2</sub> O <sub>5</sub> |

The value of  $x$  in the as-synthesized Na <sub>$x$</sub> V<sub>2</sub>O<sub>5</sub> samples is determined based on XPS spectra. For a homogeneous sample containing  $n$  elements, the molar concentration of element  $i$  can be calculated using the following formula[1]:

$$x_i = \frac{A_i/s_i}{\sum_{j=1}^n (A_j/s_j)} \quad (\text{S1})$$

Where  $A_i$  is the area under the corresponding core-level peak, and  $s_i$  is the relative sensitivity factor (RSF), which is a value determined experimentally under the same instrument and conditions for each core-level peak.

**Table S2 The Li<sup>+</sup> diffusion coefficient values of Na<sub>x</sub>V<sub>2</sub>O<sub>5</sub> samples at different discharge/charge states.**

| Material | State                          | Potential (V)                | D (cm <sup>2</sup> s <sup>-1</sup> ) | State                          | Potential (V)                | D (cm <sup>2</sup> s <sup>-1</sup> ) |
|----------|--------------------------------|------------------------------|--------------------------------------|--------------------------------|------------------------------|--------------------------------------|
| SP-NVO   | Discharge                      | 2.19                         | 1.77×10 <sup>-12</sup>               | Charge                         | 0.34                         | 4.60×10 <sup>-11</sup>               |
|          |                                | 1.99                         | 3.02×10 <sup>-12</sup>               |                                | 0.53                         | 1.23×10 <sup>-11</sup>               |
|          |                                | 1.81                         | 3.22×10 <sup>-12</sup>               |                                | 0.68                         | 9.20×10 <sup>-12</sup>               |
|          |                                | 1.59                         | 2.78×10 <sup>-12</sup>               |                                | 0.82                         | 5.48×10 <sup>-12</sup>               |
|          |                                | 1.35                         | 1.49×10 <sup>-12</sup>               |                                | 0.95                         | 3.21×10 <sup>-12</sup>               |
|          |                                | 1.13                         | 2.63×10 <sup>-12</sup>               |                                | 1.07                         | 3.03×10 <sup>-12</sup>               |
|          |                                | 0.98                         | 2.09×10 <sup>-12</sup>               |                                | 1.19                         | 2.23×10 <sup>-12</sup>               |
|          |                                | 0.86                         | 1.24×10 <sup>-12</sup>               |                                | 1.33                         | 1.36×10 <sup>-12</sup>               |
|          |                                | 0.74                         | 1.23×10 <sup>-12</sup>               |                                | 1.49                         | 1.07×10 <sup>-12</sup>               |
|          |                                | 0.64                         | 2.22×10 <sup>-12</sup>               |                                | 1.64                         | 9.29×10 <sup>-13</sup>               |
|          |                                | 0.55                         | 2.55×10 <sup>-12</sup>               |                                | 1.78                         | 9.46×10 <sup>-13</sup>               |
|          |                                | 0.46                         | 9.91×10 <sup>-13</sup>               |                                | 1.93                         | 1.02×10 <sup>-12</sup>               |
|          |                                | 0.30                         | 4.14×10 <sup>-13</sup>               |                                | 2.07                         | 1.09×10 <sup>-12</sup>               |
|          |                                | 0.28                         | 2.51×10 <sup>-13</sup>               |                                | 2.19                         | 1.09×10 <sup>-12</sup>               |
|          |                                | 0.22                         | 1.62×10 <sup>-13</sup>               |                                | 2.31                         | 1.22×10 <sup>-12</sup>               |
|          |                                | 0.17                         | 9.60×10 <sup>-14</sup>               |                                | 2.42                         | 1.44×10 <sup>-12</sup>               |
|          |                                | 0.14                         | 4.83×10 <sup>-14</sup>               |                                | 2.54                         | 1.75×10 <sup>-12</sup>               |
|          | 0.13                           | 2.13×10 <sup>-11</sup>       |                                      |                                |                              |                                      |
|          | <b>Average D<sub>Li+</sub></b> | <b>2.64×10<sup>-12</sup></b> |                                      | <b>Average D<sub>Li+</sub></b> | <b>5.49×10<sup>-12</sup></b> |                                      |
| MP-NVO-1 | Discharge                      | 2.14                         | 7.87×10 <sup>-12</sup>               | Charge                         | 0.37                         | 4.94×10 <sup>-11</sup>               |
|          |                                | 1.90                         | 4.45×10 <sup>-12</sup>               |                                | 0.56                         | 1.24×10 <sup>-11</sup>               |
|          |                                | 1.64                         | 1.19×10 <sup>-12</sup>               |                                | 0.72                         | 7.20×10 <sup>-12</sup>               |
|          |                                | 1.25                         | 7.96×10 <sup>-13</sup>               |                                | 0.88                         | 3.61×10 <sup>-12</sup>               |
|          |                                | 0.99                         | 7.52×10 <sup>-13</sup>               |                                | 1.05                         | 1.97×10 <sup>-12</sup>               |
|          |                                | 0.82                         | 6.04×10 <sup>-13</sup>               |                                | 1.24                         | 8.02×10 <sup>-13</sup>               |
|          |                                | 0.68                         | 1.01×10 <sup>-12</sup>               |                                | 1.45                         | 4.69×10 <sup>-13</sup>               |
|          |                                | 0.58                         | 1.29×10 <sup>-12</sup>               |                                | 1.64                         | 4.02×10 <sup>-13</sup>               |
|          |                                | 0.47                         | 8.79×10 <sup>-13</sup>               |                                | 1.79                         | 3.46×10 <sup>-13</sup>               |
|          |                                | 0.37                         | 3.83×10 <sup>-13</sup>               |                                | 1.94                         | 3.42×10 <sup>-13</sup>               |
|          |                                | 0.28                         | 1.76×10 <sup>-13</sup>               |                                | 2.07                         | 3.80×10 <sup>-13</sup>               |
|          |                                | 0.22                         | 7.68×10 <sup>-14</sup>               |                                | 2.18                         | 4.57×10 <sup>-13</sup>               |
|          |                                | 0.20                         | 2.02×10 <sup>-14</sup>               |                                | 2.29                         | 6.36×10 <sup>-13</sup>               |
|          |                                | 0.18                         | 1.74×10 <sup>-15</sup>               |                                | 2.41                         | 9.88×10 <sup>-13</sup>               |
|          |                                | 0.17                         | 3.49×10 <sup>-15</sup>               |                                | 2.53                         | 1.23×10 <sup>-12</sup>               |
|          |                                | 0.15                         | 5.52×10 <sup>-15</sup>               |                                | 2.65                         | 1.63×10 <sup>-12</sup>               |
|          |                                | 0.14                         | 1.55×10 <sup>-11</sup>               |                                |                              |                                      |
|          | <b>Average D<sub>Li+</sub></b> | <b>2.06×10<sup>-12</sup></b> |                                      | <b>Average D<sub>Li+</sub></b> | <b>5.14×10<sup>-12</sup></b> |                                      |
| MP-NVO-2 | Discharge                      | 2.07                         | 5.48×10 <sup>-12</sup>               | Charge                         | 0.15                         | 1.36×10 <sup>-11</sup>               |
|          |                                | 1.87                         | 2.63×10 <sup>-12</sup>               |                                | 0.35                         | 4.96×10 <sup>-11</sup>               |
|          |                                | 1.65                         | 1.19×10 <sup>-12</sup>               |                                | 0.51                         | 8.76×10 <sup>-12</sup>               |
|          |                                | 1.35                         | 5.32×10 <sup>-13</sup>               |                                | 0.65                         | 5.47×10 <sup>-12</sup>               |
|          |                                | 1.08                         | 5.96×10 <sup>-13</sup>               |                                | 0.78                         | 2.83×10 <sup>-12</sup>               |
|          |                                | 0.92                         | 4.93×10 <sup>-13</sup>               |                                | 0.91                         | 1.71×10 <sup>-12</sup>               |
|          |                                | 0.80                         | 3.87×10 <sup>-13</sup>               |                                | 1.03                         | 1.06×10 <sup>-12</sup>               |
|          |                                | 0.70                         | 4.69×10 <sup>-13</sup>               |                                | 1.16                         | 5.26×10 <sup>-13</sup>               |
|          |                                | 0.60                         | 8.25×10 <sup>-13</sup>               |                                | 1.33                         | 3.28×10 <sup>-13</sup>               |
|          |                                | 0.52                         | 7.84×10 <sup>-13</sup>               |                                | 1.48                         | 2.16×10 <sup>-13</sup>               |
|          |                                | 0.44                         | 3.80×10 <sup>-13</sup>               |                                | 1.63                         | 1.66×10 <sup>-13</sup>               |
|          |                                | 0.37                         | 1.59×10 <sup>-13</sup>               |                                | 1.76                         | 1.73×10 <sup>-13</sup>               |
|          |                                | 0.31                         | 1.10×10 <sup>-13</sup>               |                                | 1.87                         | 1.81×10 <sup>-13</sup>               |
|          |                                | 0.25                         | 7.01×10 <sup>-14</sup>               |                                | 1.98                         | 1.65×10 <sup>-13</sup>               |
|          |                                | 0.22                         | 2.09×10 <sup>-14</sup>               |                                | 2.08                         | 1.84×10 <sup>-13</sup>               |
|          |                                | 0.20                         | 5.87×10 <sup>-15</sup>               |                                | 2.17                         | 2.23×10 <sup>-13</sup>               |
|          |                                | 0.19                         | 3.18×10 <sup>-15</sup>               |                                | 2.27                         | 3.21×10 <sup>-13</sup>               |
| 0.18     | 1.29×10 <sup>-15</sup>         | 2.37                         | 3.87×10 <sup>-13</sup>               |                                |                              |                                      |
| 0.17     | 1.30×10 <sup>-15</sup>         | 2.47                         | 4.63×10 <sup>-13</sup>               |                                |                              |                                      |
| 0.16     | 6.00×10 <sup>-15</sup>         | 2.58                         | 4.96×10 <sup>-13</sup>               |                                |                              |                                      |
| 0.14     | 1.57×10 <sup>-15</sup>         |                              |                                      |                                |                              |                                      |
|          | <b>Average D<sub>Li+</sub></b> | <b>6.73×10<sup>-13</sup></b> |                                      | <b>Average D<sub>Li+</sub></b> | <b>4.13×10<sup>-12</sup></b> |                                      |

**Table S3 The summarization of cycling performance of vanadium-based full cells.**

| Material                                                                                                                    | Energy density<br>(Wh kg <sup>-1</sup> ) | Power density<br>(W kg <sup>-1</sup> ) | Discharge current<br>(mA g <sup>-1</sup> ) | Capacity<br>(mAh g <sup>-1</sup> ) | Capacity retention | Ref.        |
|-----------------------------------------------------------------------------------------------------------------------------|------------------------------------------|----------------------------------------|--------------------------------------------|------------------------------------|--------------------|-------------|
| Li <sub>3</sub> VO <sub>4</sub> /C                                                                                          | 50.0                                     | 310.0                                  | 1000                                       | 274.0                              | 56.4%              | [2]         |
| Hs  Li <sub>3</sub> V <sub>2</sub> (PO <sub>4</sub> ) <sub>3</sub> /C Hs                                                    |                                          |                                        |                                            |                                    |                    |             |
| Li <sub>3</sub> VO <sub>4</sub> /CNTs  V <sub>2</sub> O <sub>5</sub>                                                        | 159.2                                    | 227.5                                  | 1000                                       | 62.0                               | 71.4%              | [3]         |
| Li <sub>3</sub> VO <sub>4</sub> -CNT  V <sub>2</sub> O <sub>5</sub> -HM                                                     | 10.0                                     | 284.0                                  | 0.67C                                      | 100.0                              | 71.3%              | [4]         |
| LiVO <sub>3</sub>   Li <sub>3</sub> V <sub>2</sub> (PO <sub>4</sub> ) <sub>3</sub>                                          | 67.5                                     | 152.7                                  | 50                                         | 112.0                              | 70.4%              | [5]         |
| KSVO  LiFePO <sub>4</sub>                                                                                                   | 194.4                                    | 88.2                                   | 1000                                       | 36.0                               | 95.1%              | [6]         |
| mc-LVO/C NFs  LiFePO <sub>4</sub>                                                                                           | 40.0                                     | 182.8                                  | 500                                        | 282.0                              | 86.1%              | [7]         |
| <b>α'-Na<sub>x</sub>V<sub>2</sub>O<sub>5</sub>  Li<sub>3</sub>V<sub>2</sub>(PO<sub>4</sub>)<sub>3</sub><br/>(0.5-2.5 V)</b> | <b>285.7</b>                             | <b>256.0</b>                           | <b>100</b>                                 | <b>135.7</b>                       | <b>87.0%</b>       | <b>This</b> |
| <b>α'-Na<sub>x</sub>V<sub>2</sub>O<sub>5</sub>  Li<sub>3</sub>V<sub>2</sub>(PO<sub>4</sub>)<sub>3</sub><br/>(1-3.5 V)</b>   | <b>158.1</b>                             | <b>289.9</b>                           | <b>100</b>                                 | <b>144.8</b>                       | <b>86.6%</b>       | <b>work</b> |
| <b>α'-Na<sub>x</sub>V<sub>2</sub>O<sub>5</sub>  LiFePO<sub>4</sub></b>                                                      | <b>374.1</b>                             | <b>432.9</b>                           | <b>100</b>                                 | <b>241.9</b>                       | <b>98.0%</b>       |             |

## References

1. G. Greczynski and L. Hultman, *Prog. Mater. Sci.*, 2020, **107**, 100591.
2. X. Bai, D. Li, D. Zhang, S. Yang, C. Pei, B. Sun and S. Ni, *J. Mater. Chem. A*, 2023, **11**, 12164–12175.
3. Y. Shan, L. Xu, Y. Hu, H. Jiang and C. Li, *Chem. Eng. Sci.*, 2019, **200**, 38–45.
4. P. Zhang, L. Zhao, Q. An, Q. Wei, L. Zhou, X. Wei, J. Sheng and L. Mai, *Small*, 2016, **12**, 1082–1090.
5. S. Shao, B. Liu, M. Zhang, J. Yin, Y. Gao, K. Ye, J. Yan, G. Wang, K. Zhu and D. Cao, *J. Energy Storage*, 2021, **35**, 102254.
6. Q. Zhang, S. Ma, W. Wang, S. Gao, Y. Ou, S. Li, X. Liu and C. Lin, *Energy Storage Mater.*, 2022, **52**, 637–645.
7. L. Kuang, B. Sun, S. Yang, D. Zhang, C. Pei, P. Li, T. Xiao and S. Ni, *J. Mater. Chem. A*, 2024, **12**, 4008–4018.
